# Supplementary material for: Manipulation of combustion waves in carbon-nanotube/fuel composites by highly reactive Mg nanoparticles
Source: Royal Society of Chemistry journal article supplement (doi:10.1039/c5nr03795f), 2015-01-01
Supplement: c5nr03795f1.pdf [file c5nr03795f1.pdf]

[Supporting information]

**Manipulation of Combustion Waves in Carbon-Nanotube/Fuel Composites  
by Highly Reactive Mg Nanoparticles**

Kang Yeol Lee, Hayoung Hwang, Dongjoon Shin, and Wonjoon Choi\*

School of Mechanical Engineering, Korea University (BK21+), Seoul, Korea, 136-701

\*Authors to whom correspondence should be addressed: Wonjoon Choi: e-mail:  
*wojchoi@korea.ac.kr*, Phone: +82 2 3290 5951, Fax: +82 2 926 9290.

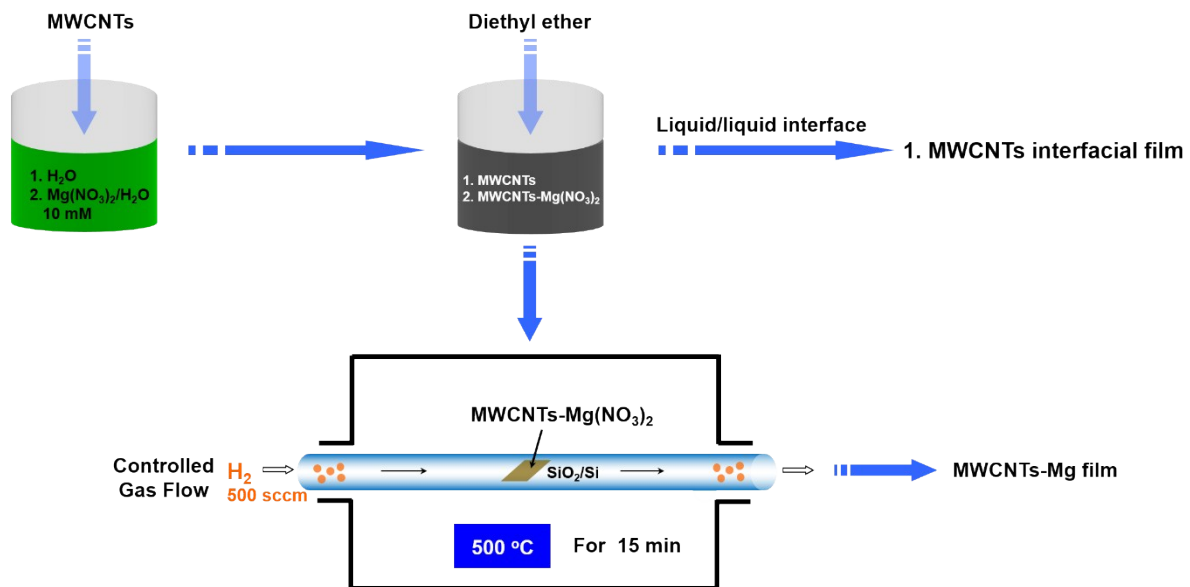

**Figure S1.** Preparation of MWCNTs and MWCNT-Mg films.

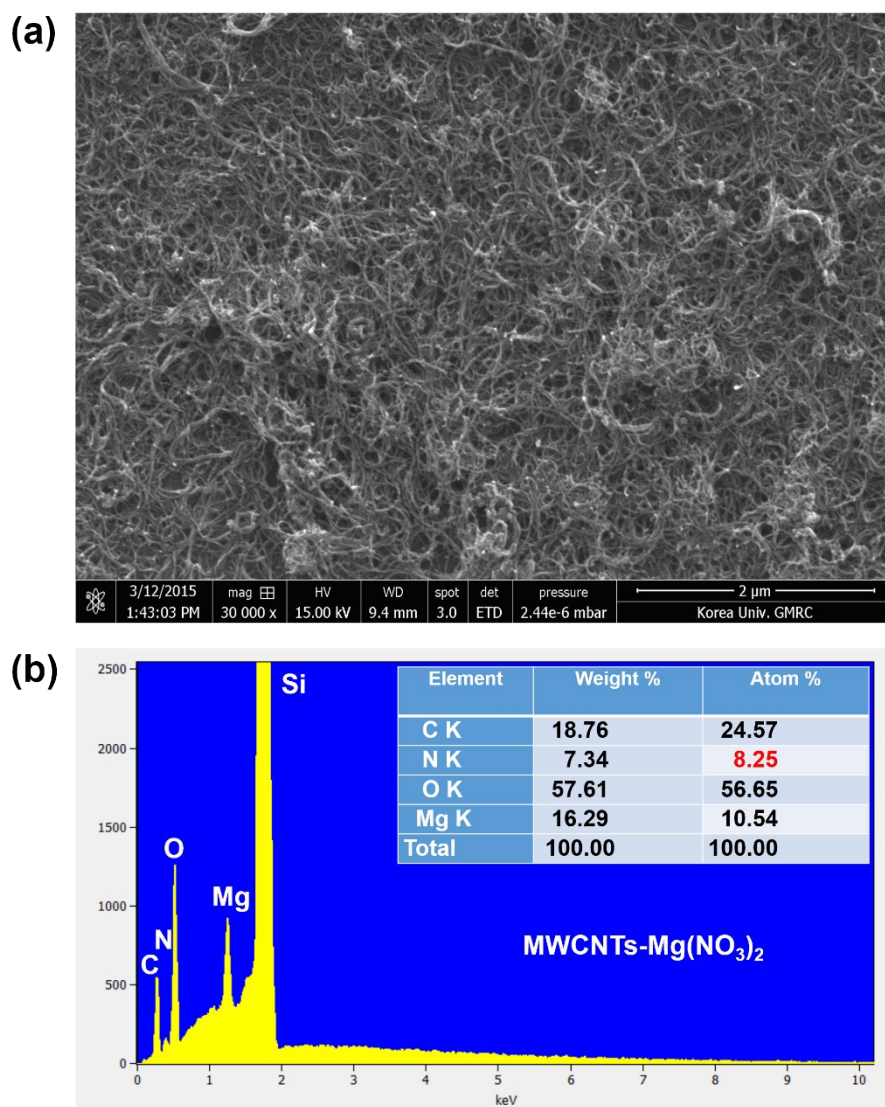

**Figure S2.** (a) SEM image of the MWCNTs-Mg(NO<sub>3</sub>)<sub>2</sub> composite and (b) EDX spectrum of the same composite on an SiO<sub>2</sub>/Si substrate.

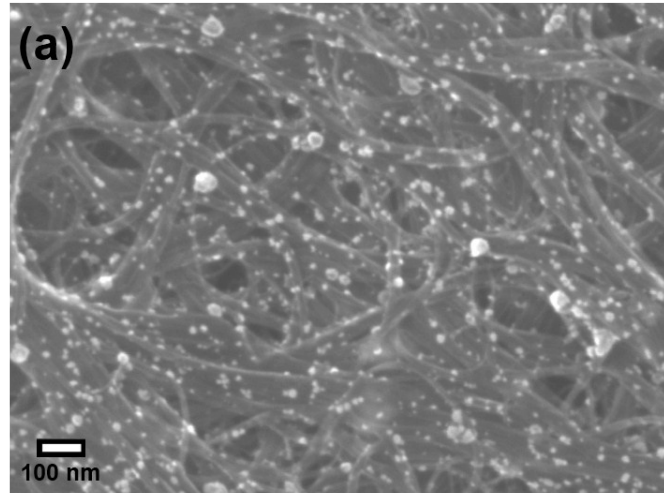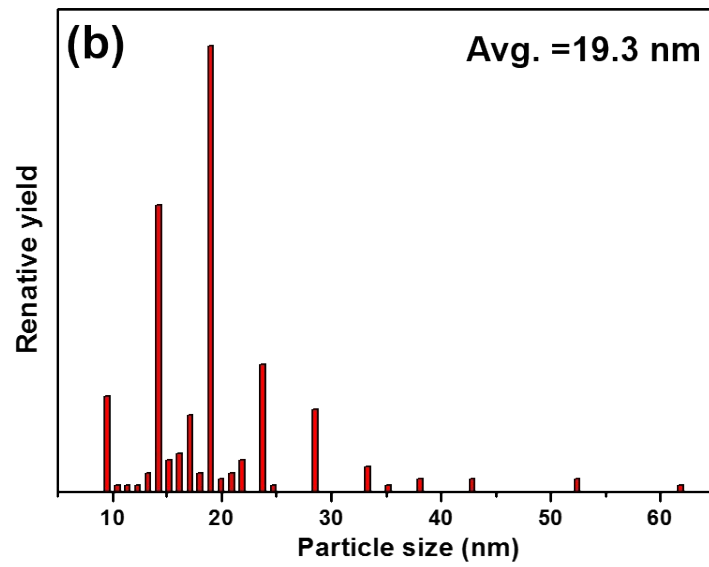

**Figure S3.** (a) High-resolution SEM images of Mg/MgO nanoparticles in MWCNTs and (b) size distribution of the Mg/MgO nanoparticles attached to the sidewalls of the MWCNTs.
